# Supplementary material
Source: publisher figshare collection journal article supplement (https://sage.figshare.com/ndownloader/files/13627553)
Supplement: Supplementary file 1 [file 13627553]

## Appendix 1

### Genetic diversity of dominant plant species in tropical land-use systems on Sumatra, Indonesia

Natalie Breidenbach<sup>1\*</sup>, Sri Rahayu<sup>2</sup>, Iskandar Z. Siregar<sup>3</sup>, Ulfah J. Siregar<sup>3</sup>, Ir. Hamzah<sup>4</sup>, Reiner Finkeldey<sup>1,5</sup>

<sup>1</sup> Georg August University of Göttingen, Department of Forest Genetics and Forest Tree Breeding, Büsgenweg 2, 37077 Göttingen, Germany

<sup>2</sup> Centre for Plant Conservation, Bogor Botanic Gardens, Indonesian Institute of Science (LIPI), Jl. Ir. H. Juanda, Bogor 16143, Indonesia

<sup>3</sup> Department of Silviculture, Faculty of Forestry, Bogor Agricultural University (IPB), Jl. Raya Dramaga, Bogor 16680, Indonesia

<sup>4</sup> Forestry Faculty, Jambi University, Jl. Lintas Jambi-Muara Bulian Km15, Jambi 36122, Indonesia

<sup>5</sup> Kassel University, Mönchbergstrasse 19, 34109 Kassel, Germany

\*Corresponding author Email: natalie.breidenbach@forst.uni-goettingen.de

### Tropical Conservation Science

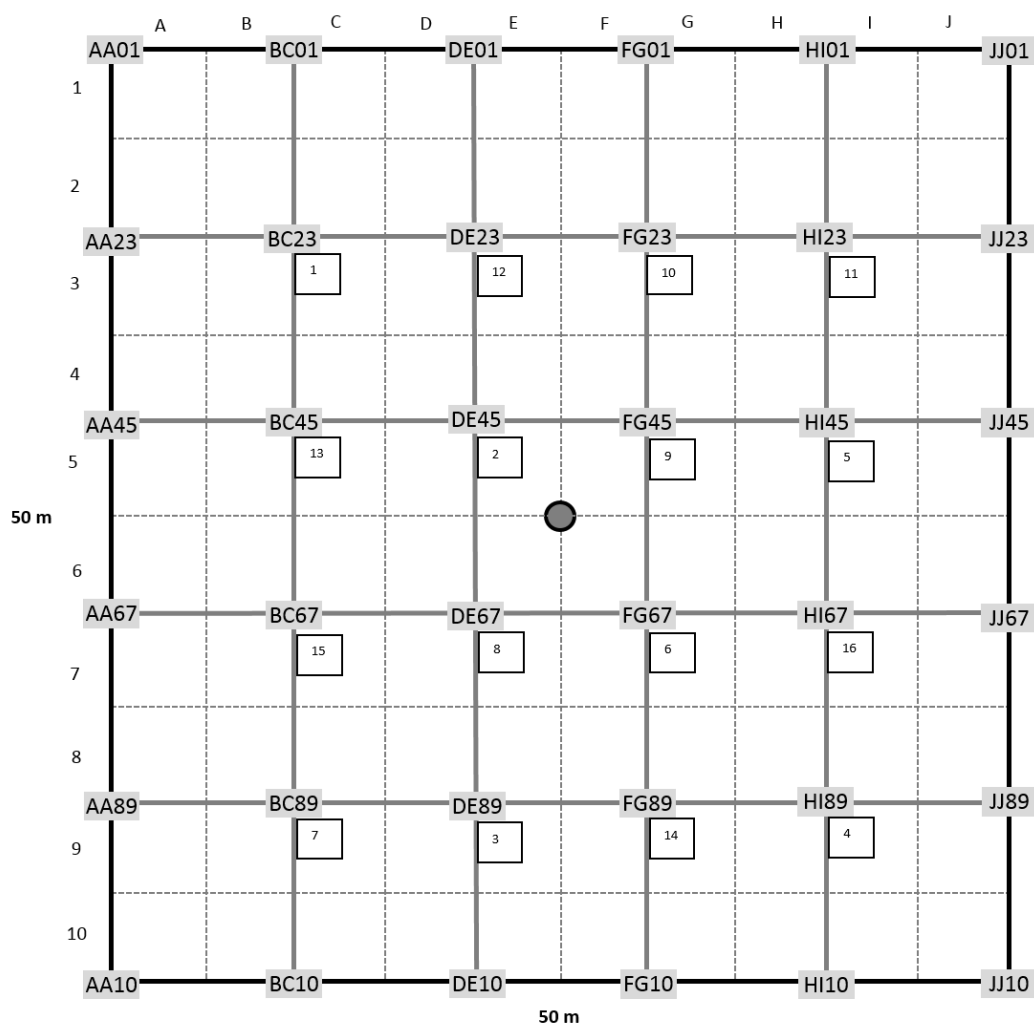

**Appendix 1:** Plot design for all 32 plots EFForTS (Drescher et.al.2016). Framed numbers present the positions where dominant plant species were determined. In the tree-dominated systems the “Bitterlich-Method” was applied, in the plantation systems determining the closest species to the 16 positions.

| Bukit Dua Belas |     |     |     |               |     |     |     |          |     |     |     |        |     | Harapan |     |        |     |     |     |               |     |     |     |          |     |     |     |        |     |     |     |
|-----------------|-----|-----|-----|---------------|-----|-----|-----|----------|-----|-----|-----|--------|-----|---------|-----|--------|-----|-----|-----|---------------|-----|-----|-----|----------|-----|-----|-----|--------|-----|-----|-----|
| Forest          |     |     |     | Jungle Rubber |     |     |     | Oil palm |     |     |     | Rubber |     |         |     | Forest |     |     |     | Jungle rubber |     |     |     | Oil palm |     |     |     | Rubber |     |     |     |
| BF1             | BF2 | BF3 | BF4 | BJ2           | BJ3 | BJ4 | BJ5 | BO2      | BO3 | BO4 | BO5 | BR1    | BR2 | BR3     | BR4 | HF1    | HF2 | HF3 | HF4 | HJ1           | HJ2 | HJ3 | HJ4 | HO1      | HO2 | HO3 | HO4 | HR1    | HR2 | HR3 | HR4 |

**Appendix 1a:** Overview of plot names per land-use systems and region.  
 Colours are indicating diversity levels: dark green presents the plot level ( $\alpha$ -level), medium green land-use ( $\beta$ -level) and light green the region ( $\gamma$ -level).
